# Supplementary material for: Brain‐associated innate leukocytes display diverse inflammatory states following experimental stroke
Source: PubMed Central journal article supplement — Immunol Cell Biol. 2022 Jun 15;100(7):482–96. doi: 10.1111/imcb.12560 (PMC9541155; doi:10.1111/imcb.12560), 2022-06-15
Supplement: IMCB-100-482-s001.pdf [file IMCB-100-482-s001.pdf]

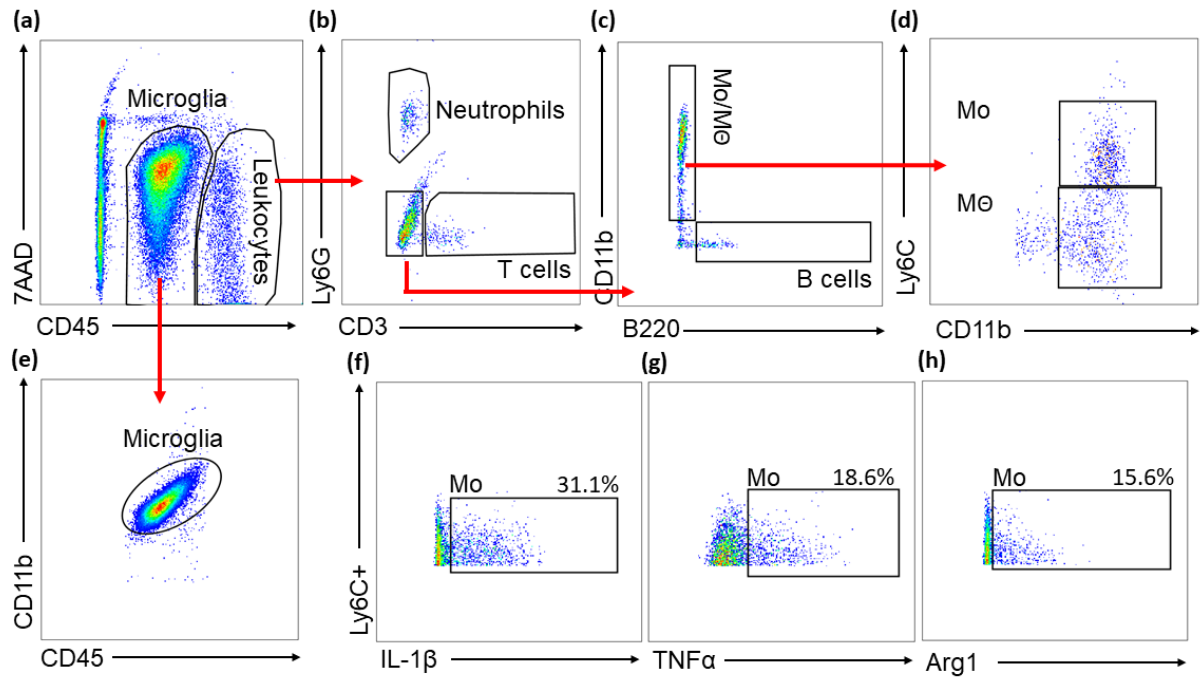

**Supplementary figure 1: Gating strategy of innate immune cells.** Plots represent samples from ipsilateral hemispheres of post-pMCAO animal at 24 h. **(a, e)** Microglia were defined as 7AAD<sup>-</sup> CD45<sup>mid</sup> and expanded as CD11b<sup>+</sup>. Leukocytes were defined as 7AAD<sup>-</sup> CD45<sup>hi</sup>. **(b)** Neutrophils were defined as Ly6G<sup>+</sup>CD3<sup>-</sup> from the initial leukocyte gate. **(c)** Monocytes and macrophages were defined as CD11b<sup>+</sup>B220<sup>-</sup> from the Ly6G<sup>-</sup>CD3<sup>-</sup> population. **(d)** Monocytes were further separated as Ly6C<sup>+</sup> and macrophages as Ly6C<sup>-</sup>. Intracellular cytokine production of IL-1β **(f)**, TNFα **(g)** and expression of Arg1 **(h)** were assessed.
